# Supplementary material for: Microstructural and Nanoindentation Investigation on the Laser Powder Bed Fusion Stainless Steel 316L
Source: MDPI journal article supplement (doi:10.3390/ma16175933), 2023-08-30
Supplement: s1 [file s1]

**Supplementary material:**

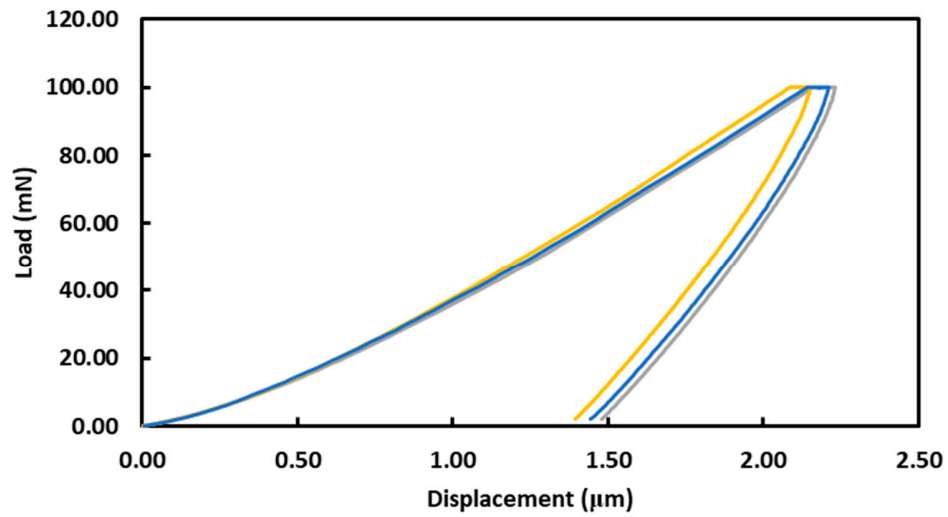

Figure S1: Typical load-displacement graphs on wrought stainless steel 316L.

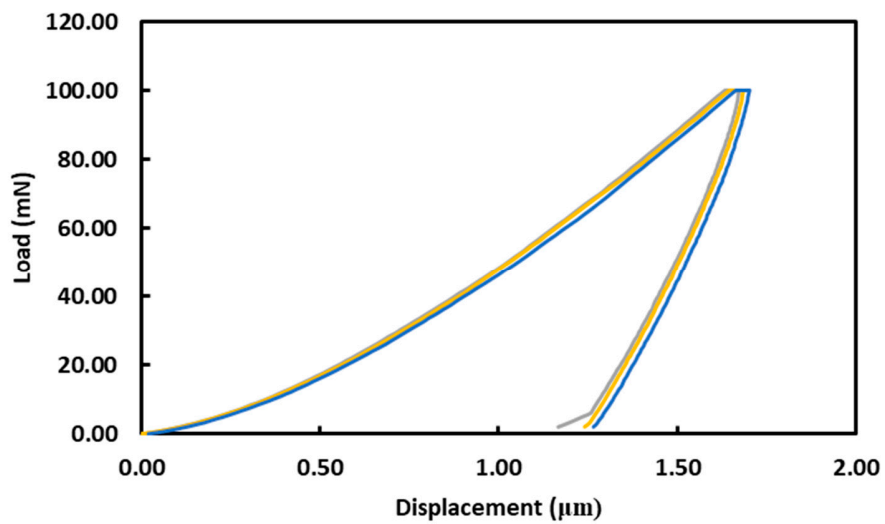

Figure S2: Typical load-displacement graphs on horizontal plan of L-PBF processed stainless steel 316L.

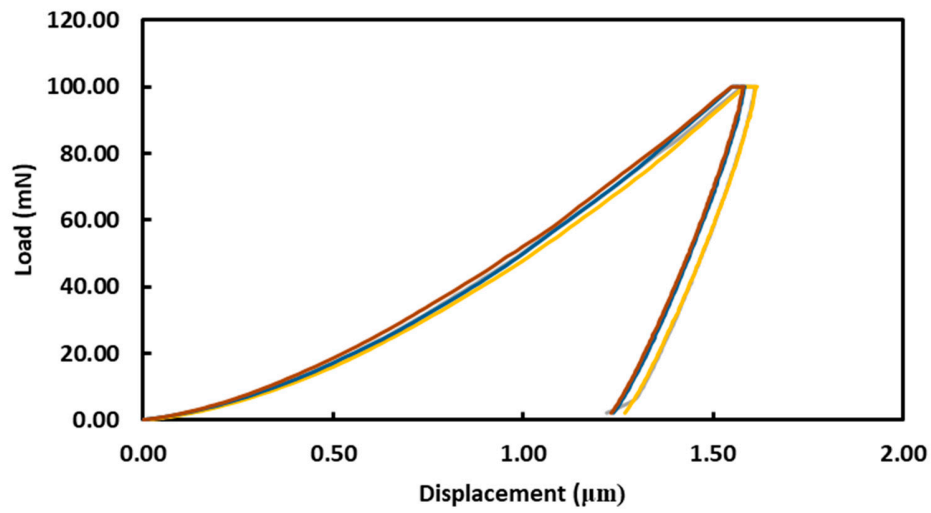

Figure S3: Typical load-displacement graphs on the frontal plan of L-PBF processed stainless steel 316L.

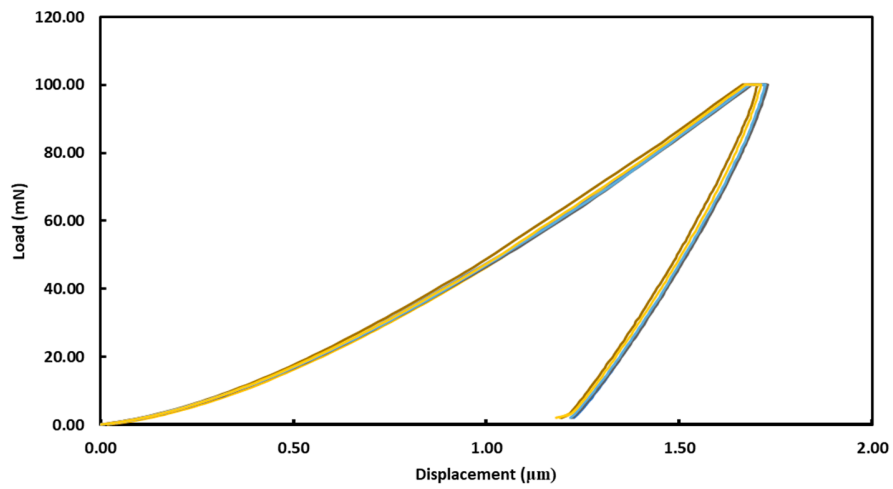

Figure S4: Typical load-displacement graphs on the lateral plan of L-PBF processed stainless steel 316L.
